# Supplementary material for: Hydrothermally grown novel pyramids of the CaTiO3 perovskite as an efficient electrode modifier for sensing applications
Source: Royal Society of Chemistry journal article supplement (doi:10.1039/d0ma00303d), 2020-01-01
Supplement: d0ma00303d1.pdf [file d0ma00303d1.pdf]

## Supplementary Information

**Hydrothermally grown novel pyramids of CaTiO<sub>3</sub> perovskite as efficient electrode modifier  
for sensing applications**

**Khursheed Ahmad,<sup>a</sup> Praveen Kumar<sup>a</sup> and Shaikh M. Mobin<sup>\*a,b,c</sup>**

<sup>a</sup>Discipline of Chemistry, <sup>b</sup>Discipline of Biosciences and Bio-Medical Engineering and

<sup>c</sup>Discipline of Metallurgy Engineering and Materials Science, Indian Institute of Technology

Indore, Simrol, Khandwa Road, Indore 453552, India

\*Corresponding author: email: [xray@iiti.ac.in](mailto:xray@iiti.ac.in)

Tel: +91-7312438752

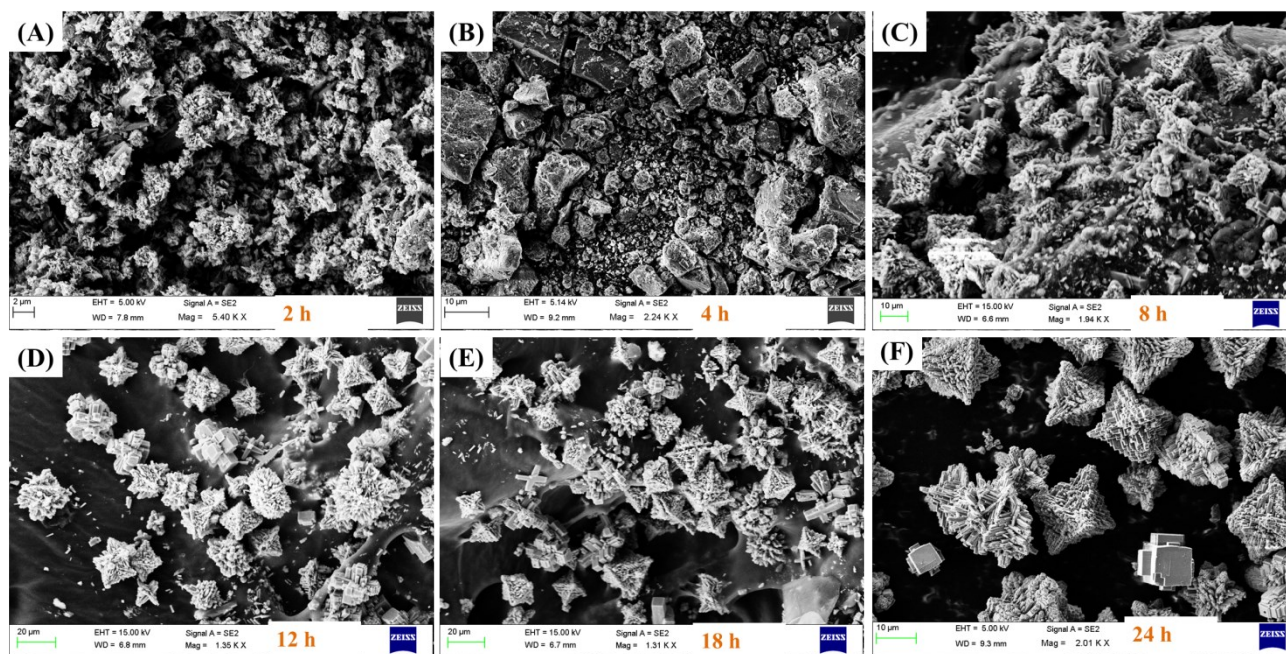

**Fig. S1** FE-SEM images of the prepared CaTiO<sub>3</sub> pyramids at different time intervals; 2 h (A), 4 h (B), 8 h (C), 12 h (D), 18 h (E) and 24 h (F).
